# Supplementary material for: Efficacy Confirmation Test of Black Cumin (Nigella sativa L.) Seeds Extract Using a High-Fat Diet Mouse Model
Source: MDPI journal article supplement (doi:10.3390/metabo13040501), 2023-03-30
Supplement: s1 [file s1]

Supplementary Material

# Efficacy Confirmation Test of Black Cumin (*Nigella sativa* L.) Seeds Extract Using High-Fat Diet Mouse Model

Khawaja Muhammad Imran Bashir <sup>1,†</sup>, Joo Wan Kim <sup>2,†</sup>, Jong-Kyu Kim <sup>3</sup>, Yoon-Seok Chun <sup>3</sup>, Jae-Suk Choi <sup>4,\*</sup>, and Sae-Kwang Ku <sup>5,\*</sup>

<sup>1</sup> German Engineering Research Center for Life Science Technologies in Medicine and Environment, Busan 46742, Republic of Korea; imran.bashir@lstme.org

<sup>2</sup> Department of Companion Animal Health, Daegu Haany University, Gyeongsan 38610, Republic of Korea; dvm\_jkkm@dhu.ac.kr

<sup>3</sup> AriBnC, Ltd., Yongin 16985, Republic of Korea; jkkm@aribnc.com (J.-K.K.); ceochun@aribnc.com (Y.S.C.)

<sup>4</sup> Department of Seafood Science and Technology, The Institute of Marine Industry, Gyeongsang National University, Tongyeong 53064, Republic of Korea

<sup>5</sup> Department of Anatomy and Histology, College of Korean Medicine, Daegu Haany University, Gyeongsan 38610, Republic of Korea

\* Correspondence: jsc1008@gnu.ac.kr (J.-S.C.); gucci200@dhu.ac.kr (S.-K.K.); Tel.: +82-55-772-9142 (J.-S.C.); +82-53-819-1549 (S.-K.K.)

† These authors contributed equally to this work.

**Table S1.** Formulas of normal and high fat diets used in this study.

| Compositions*         | Normal pellet diet | High fat diet |
|-----------------------|--------------------|---------------|
| Ingredient (g/kg)     |                    |               |
| Sucrose               | 500                | 172.8         |
| Casein                | 200                | 200           |
| Corn starch           | 150                | 72.8          |
| Cellulose             | 50                 | 50            |
| Soybean Oil           | 50                 | 25            |
| L-Cystein             | 3                  | 3             |
| Lard                  | 0                  | 177.5         |
| Mineral mixture       | 35                 | 35            |
| Vitamin mixture       | 10                 | 10            |
| Choline bitartrate    | 2                  | 2             |
| Carbohydrate (% kcal) | 64                 | 35            |
| Protein (% kcal)      | 20                 | 20            |
| Fat (% kcal)          | 16                 | 45            |
| Energy (kcal/g)       | 4.00               | 4.73          |

\*45%Kcal Fat pellet diets [Research Diet, New Brunswick, NJ, USA] was used as high fat diet and normal rodents pellet diet [Purinafeed, Seungnam, Korea] was used as normal fat pellet diets

**Table S2.** Oligonucleotides for real time RT-PCR.

| Target          | 5' – 3'   | Sequence                     | GenBank Accession Number |
|-----------------|-----------|------------------------------|--------------------------|
| PPAR $\alpha$   | Sense     | ATGCCAGTACTGCCGTTTTC         | NM_011144                |
|                 | Antisense | GGCCTTGACCTTGTTTCATGT        |                          |
| PPAR $\gamma$   | Sense     | AGTGGAGACCGCCCAGG            | NM_001127330             |
|                 | Antisense | GCAGCAGGTTGTCTTGGATGT        |                          |
| Leptin          | Sense     | CCAAAACCCCTCATCAAGACC        | NM_008493                |
|                 | Antisense | GTCCAACCTGTTGAAGAATGTCCC     |                          |
| UCP2            | Sense     | CCGCATTGGCCTCTACGACTCT       | NM_011671                |
|                 | Antisense | CCCCGAAGGCAGAAGTGAAGTG       |                          |
| Adiponectin     | Sense     | CCCAAGGGAACCTTGTGCAGGTTGGATG | NM_009605                |
|                 | Antisense | GTTGGTATCATGGTAGAGAAGAAAGCC  |                          |
| C/EBP $\alpha$  | Sense     | TGGACAAGAACAGCAACGAGTAC      | NM_001287523             |
|                 | Antisense | CGGTCATTGTCACTGGTCAACT       |                          |
| C/EBP $\beta$   | Sense     | AAGCTGAGCGACGAGTACAAGA       | NM_001287739             |
|                 | Antisense | GTCAGCTCCAGCACCTTGTG         |                          |
| SREBP1c         | Sense     | AGCCTGGCCATCTGTGAGAA         | XM_006532714             |
|                 | Antisense | CAGACTGGTACGGGCCACAA         |                          |
| FAS             | Sense     | GCTGCGGAAACTTCAGGAAAT        | NM_007988                |
|                 | Antisense | AGAGACGTGTCACCTCTGGACTT      |                          |
| ACC1            | Sense     | GCCATTGGTATTGGGGCTTAC        | NM_133360                |
|                 | Antisense | CCCGACCAAGGACTTTGTTG         |                          |
| AMPK $\alpha$ 1 | Sense     | AAGCCGACCCAATGACATCA         | XM_011245321             |
|                 | Antisense | CTTCCTTCGTACACGCAAAT         |                          |
| AMPK $\alpha$ 2 | Sense     | GATGATGAGGTGGTGA             | NM_178143                |
|                 | Antisense | GCCGAGGACAAAGTGC             |                          |
| GAPDH           | Sense     | CATCTTCCAGGAGCGAGACC         | NM_008084                |
|                 | Antisense | TCCACCACCCTGTTGCTGTA         |                          |

Real time RT-PCR = real-time reverse transcription polymerase chain reaction; PPAR = Peroxisome proliferator-activated receptor; UCP = Mitochondrial uncoupling protein; C/EBP = CCAAT-enhancer-binding protein; SREBP = Sterol regulatory element-binding protein; ACC1 = Acetyl-CoA carboxylase 1; FAS = Fatty acid synthase; AMPK = 5' adenosine monophosphate-activated protein kinase; GAPDH = Glyceraldehyde 3-phosphate dehydrogenase

**Table S3.** Changes in body weight and mean daily food consumption in NFD or HFD supplied mice.

| Groups                | Body weights (g) at days after initial test substance treatment |                           |                           |                            | Body weight gains during |                           | Mean Daily Food Consumption (g) |
|-----------------------|-----------------------------------------------------------------|---------------------------|---------------------------|----------------------------|--------------------------|---------------------------|---------------------------------|
|                       | 8 days before                                                   | 1 day before              | 0 day*                    | 84 days*                   | Adapt period             | Administration            |                                 |
|                       | [A]                                                             | [B]                       | [C]                       | [D]                        | [B-A]                    | period [D-C]              |                                 |
| Control groups        |                                                                 |                           |                           |                            |                          |                           |                                 |
| NFD                   | 27.98 ± 2.00                                                    | 28.99 ± 1.58              | 26.06 ± 1.56              | 30.07 ± 1.94               | 1.01 ± 0.87              | 4.01 ± 1.41               | 4.85 ± 0.72                     |
| HFD                   | 27.93 ± 1.28                                                    | 31.66 ± 1.88 <sup>a</sup> | 28.49 ± 1.81 <sup>a</sup> | 44.81 ± 3.07 <sup>c</sup>  | 3.73 ± 1.09 <sup>a</sup> | 16.32 ± 2.10 <sup>a</sup> | 4.27 ± 0.24 <sup>c</sup>        |
| MET <sub>250</sub>    | 27.96 ± 1.80                                                    | 31.68 ± 1.88 <sup>a</sup> | 28.47 ± 1.48 <sup>a</sup> | 37.06 ± 1.87 <sup>ce</sup> | 3.72 ± 0.88 <sup>a</sup> | 8.59 ± 1.21 <sup>ab</sup> | 4.30 ± 0.50 <sup>d</sup>        |
| Test substance groups |                                                                 |                           |                           |                            |                          |                           |                                 |
| BCS <sub>400</sub>    | 27.90 ± 0.85                                                    | 31.68 ± 1.09 <sup>a</sup> | 28.65 ± 1.05 <sup>a</sup> | 34.80 ± 1.19 <sup>ce</sup> | 3.78 ± 1.10 <sup>a</sup> | 6.15 ± 0.96 <sup>ab</sup> | 4.29 ± 0.18 <sup>c</sup>        |
| BCS <sub>200</sub>    | 27.92 ± 0.58                                                    | 31.70 ± 1.02 <sup>a</sup> | 28.75 ± 0.89 <sup>a</sup> | 37.38 ± 1.40 <sup>ce</sup> | 3.78 ± 0.84 <sup>a</sup> | 8.63 ± 0.86 <sup>ab</sup> | 4.28 ± 0.23 <sup>c</sup>        |
| BCS <sub>100</sub>    | 27.91 ± 0.54                                                    | 31.68 ± 1.02 <sup>a</sup> | 28.81 ± 1.04 <sup>a</sup> | 38.76 ± 1.39 <sup>ce</sup> | 3.77 ± 1.01 <sup>a</sup> | 9.95 ± 1.16 <sup>ab</sup> | 4.30 ± 0.21 <sup>d</sup>        |

Values are expressed as means ± S.D. ( $n = 10$ ); NFD = Vehicle (distilled water) 10 mL/kg of normal pellet diet orally administered mice; HFD = Vehicle (distilled water) 10 mL/kg of 45% Kcal high fat diet orally administered mice; MET<sub>250</sub> = Metformin administrated mice at a dose of 250 mg/kg; BCS<sub>400, 200, 100</sub> = Black cumin (*Nigella sativa* L.) seeds extract administered mice at doses of 400, 200, and 100 mg/kg; THSD = Tukey's Honest Significant Difference; DT3 = Dunnett's T3; \*All animals were overnight fasted; <sup>a</sup>  $p < 0.01$  as compared with NFD control by THSD test; <sup>c</sup>  $p < 0.01$  and <sup>d</sup>  $p < 0.05$  as compared with NFD control by DT3 test; <sup>b</sup>  $p < 0.01$  as compared with HFD control by THSD test; <sup>e</sup>  $p < 0.01$  as compared with HFD control by DT3 test

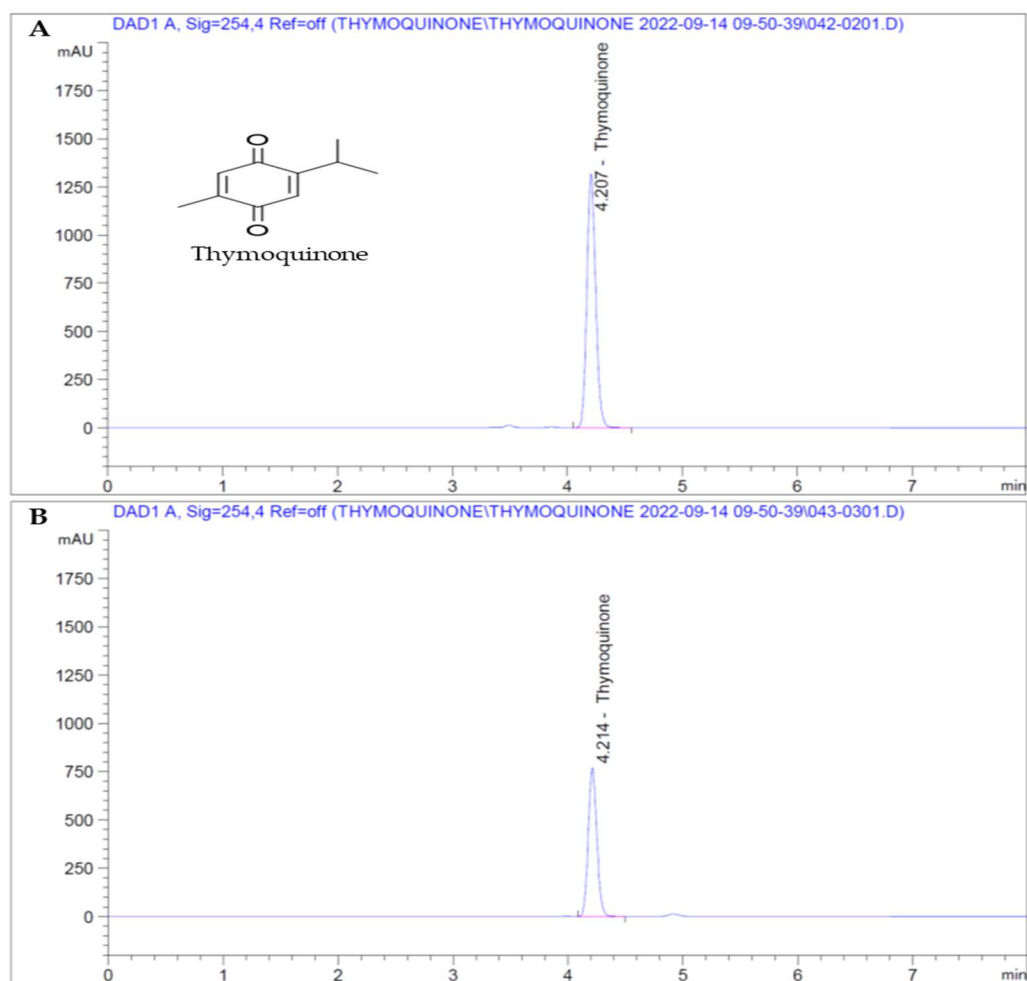

**Figure S1.** HPLC analysis of standard thymoquinone (A) and thymoquinone in the BSC extract (B).

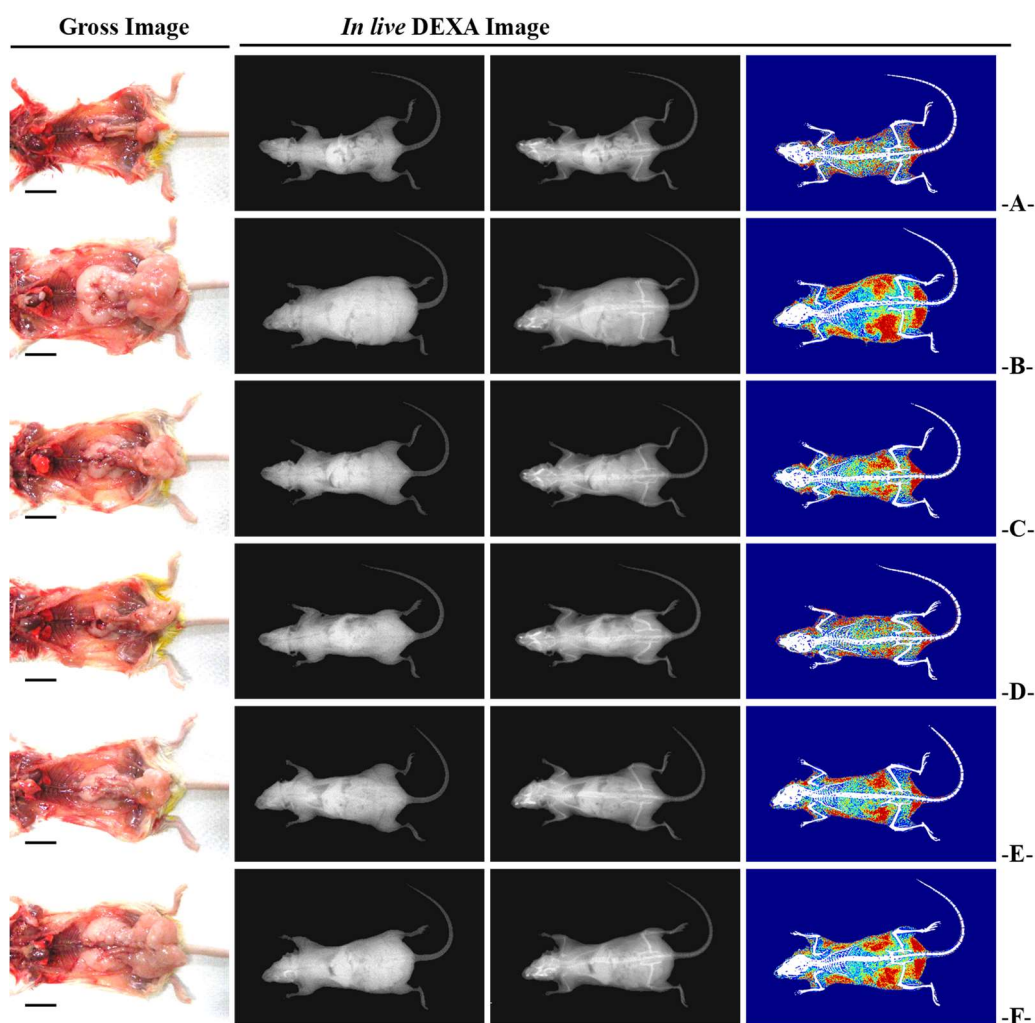

**Figure S2.** Representative gross body mass and abdominal fat pads with whole body DEXA images taken from NFD or HFD supplied mice.

**A** = Vehicle (distilled water) 10 mL/kg orally administered mice with NFD supply (NFD control); **B** = Vehicle 10 mL/kg orally administered mice with HFD supply (HFD control); **C** = Metformin (250 mg/kg) oral administered mice with HFD supply (MET<sub>250</sub>); **D** = BCS (400 mg/kg) orally administered mice with HFD supply (BCS<sub>400</sub>); **E** = BCS (200 mg/kg) orally administered mice with HFD supply (BCS<sub>200</sub>); **F** = BCS (100 mg/kg) orally administered mice with HFD supply (BCS<sub>100</sub>); NFD = Normal pellet diet; HFD = 45% Kcal high fat diet; BCS = Black cumin (*Nigella sativa* L.) seeds extract; DEXA = Dual-energy x-ray absorptiometry; Scale bar = 15.00 mm

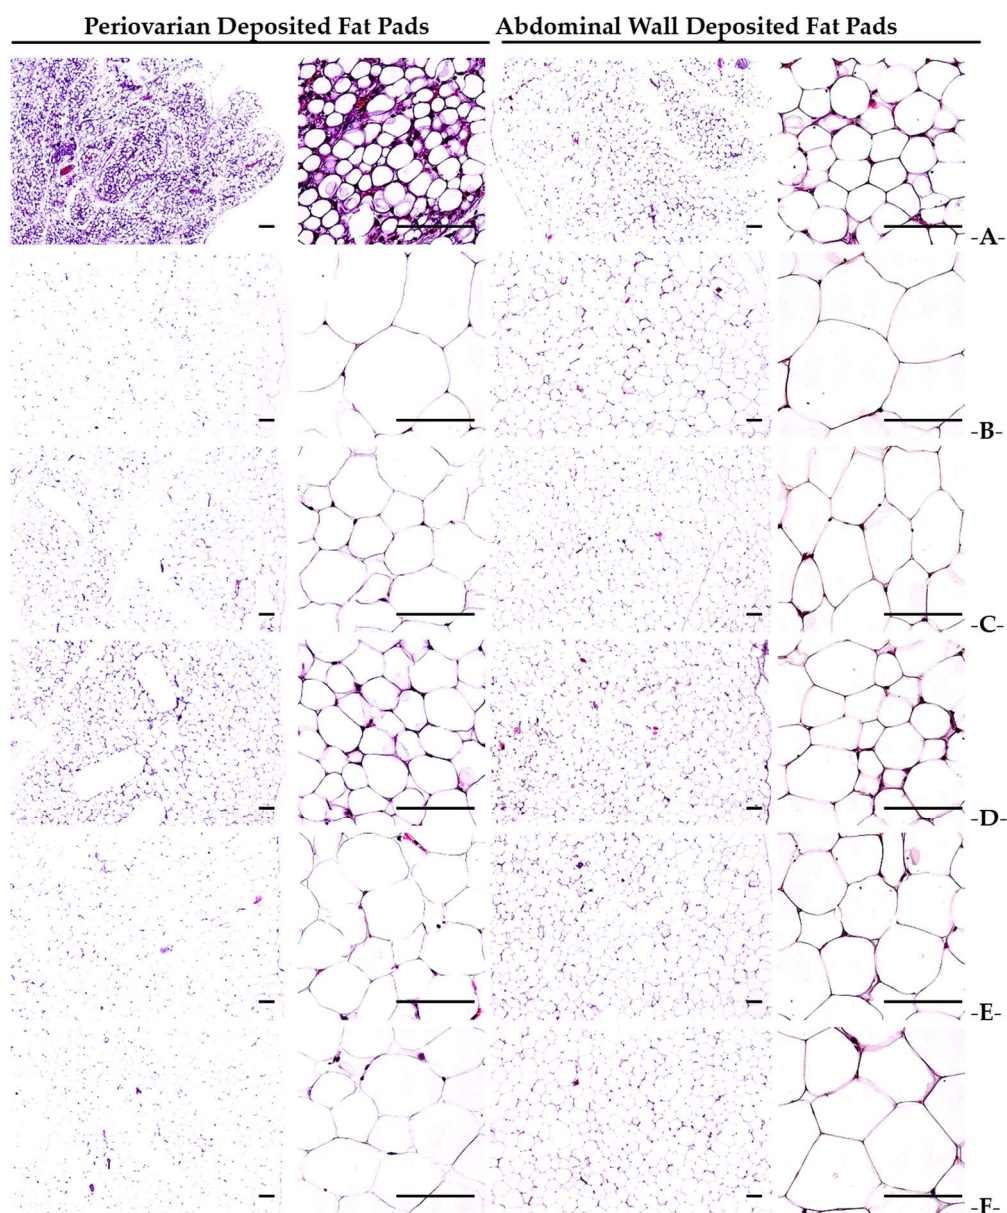

**Figure S3.** Representative histological images of the adipocytes, taken from NFD or HFD supplied mice periovarian and abdominal wall deposited fat pads.

A = Vehicle (distilled water) 10 mL/kg orally administered mice with NFD supply (NFD control); B = Vehicle 10 mL/kg orally administered mice with HFD supply (HFD control); C = Metformin (250 mg/kg) oral administered mice with HFD supply (MET<sub>250</sub>); D = BCS (400 mg/kg) orally administered mice with HFD supply (BCS<sub>400</sub>); E = BCS (200 mg/kg) orally administered mice with HFD supply (BCS<sub>200</sub>); F = BCS (100 mg/kg) orally administered mice with HFD supply (BCS<sub>100</sub>); NFD = Normal pellet diet; HFD = 45% Kcal high fat diet; BCS = Black cumin (*Nigella sativa* L.) seeds extract; All Hematoxylin and Eosin stain; Scale bars = 80  $\mu$ m.

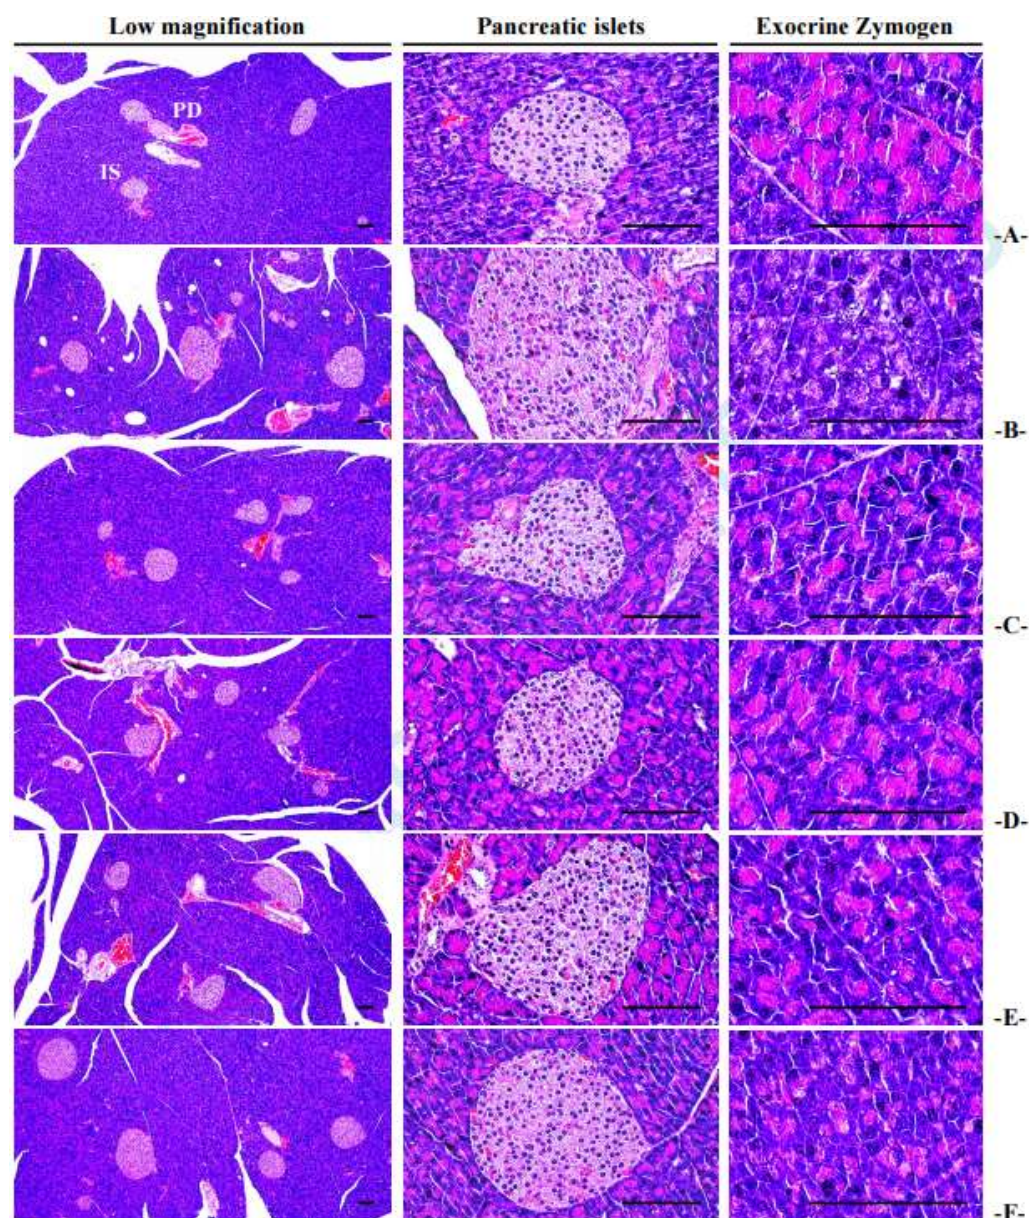

**Figure S4.** Representative general histological images of the pancreas, taken from NFD or HFD supplied mice.

**A** = Vehicle (distilled water) 10 mL/kg orally administered mice with NFD supply (NFD control); **B** = Vehicle 10 mL/kg orally administered mice with HFD supply (HFD control); **C** = Metformin (250 mg/kg) oral administered mice with HFD supply (MET<sub>250</sub>); **D** = BCS (400 mg/kg) orally administered mice with HFD supply (BCS<sub>400</sub>); **E** = BCS (200 mg/kg) orally administered mice with HFD supply (BCS<sub>200</sub>); **F** = BCS (100 mg/kg) orally administered mice with HFD supply (BCS<sub>100</sub>); NFD = Normal pellet diet; HFD = 45% Kcal high fat diet; BCS = Black cumin (*Nigella sativa* L.) seeds extract; IS = Pancreatic islet; PD = Pancreatic secretory duct; All Hematoxylin and Eosin stain; Scale bars = 80 µm

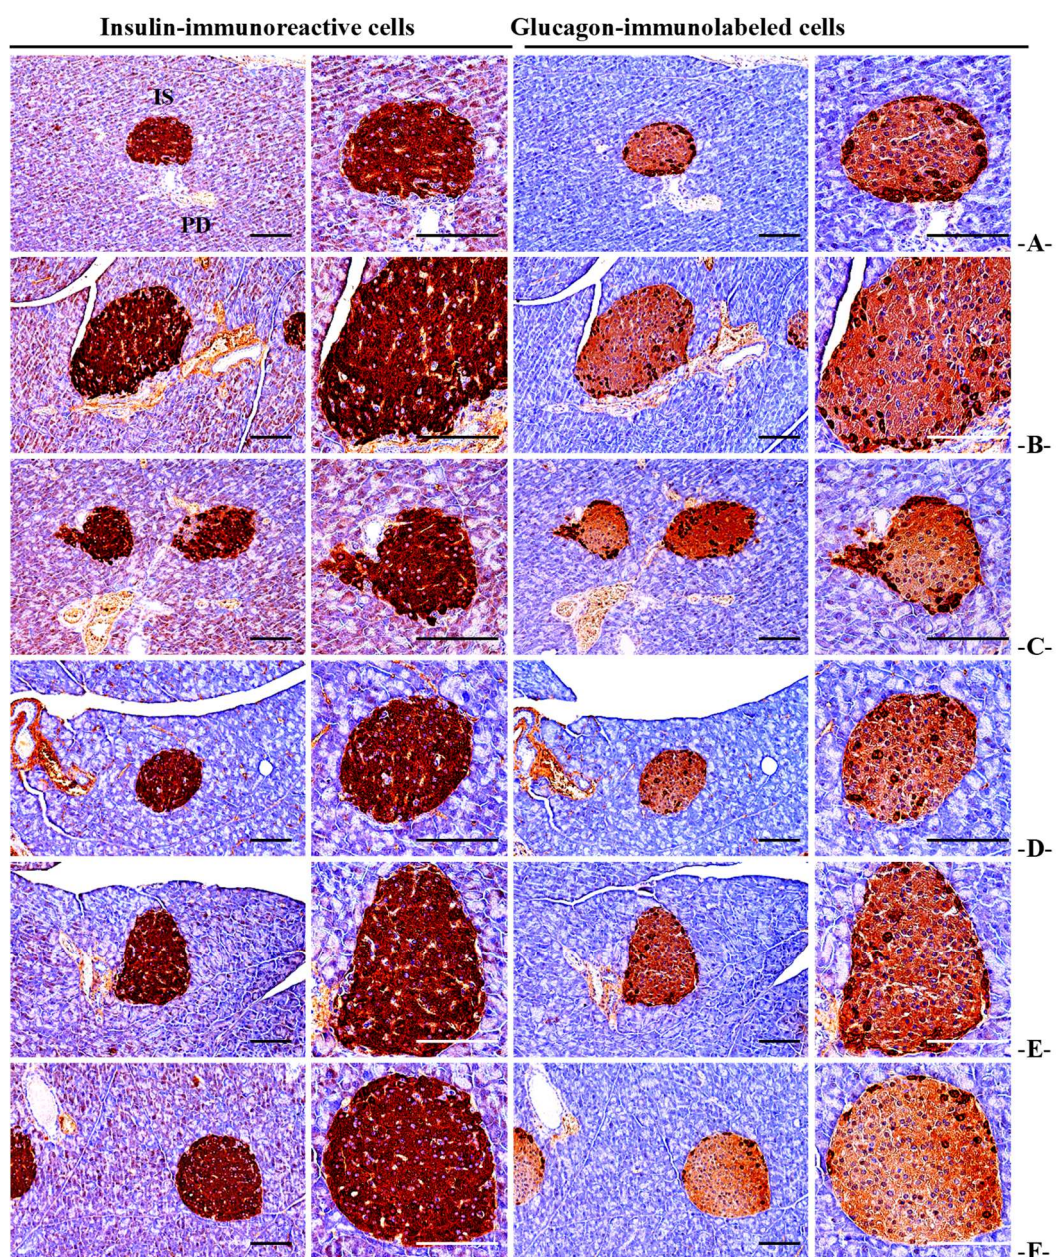

**Figure S5.** Representative histological images of the insulin- and glucagon- immunoreactive cells in the pancreas, taken from NFD or HFD supplied mice.

**A** = Vehicle (distilled water) 10 mL/kg orally administered mice with NFD supply (NFD control); **B** = Vehicle 10 mL/kg orally administered mice with HFD supply (HFD control); **C** = Metformin (250 mg/kg) oral administered mice with HFD supply (MET<sub>250</sub>); **D** = BCS (400 mg/kg) orally administered mice with HFD supply (BCS<sub>400</sub>); **E** = BCS (200 mg/kg) orally administered mice with HFD supply (BCS<sub>200</sub>); **F** = BCS (100 mg/kg) orally administered mice with HFD supply (BCS<sub>100</sub>); NFD = Normal pellet diet; HFD = 45% Kcal high fat diet; BCS = Black cumin (*Nigella sativa* L.) seeds extract; IS = Pancreatic islet; PD = Pancreatic duct; All immune-stained by avidin-biotin-peroxidase complex; Scale bars = 80 μm.

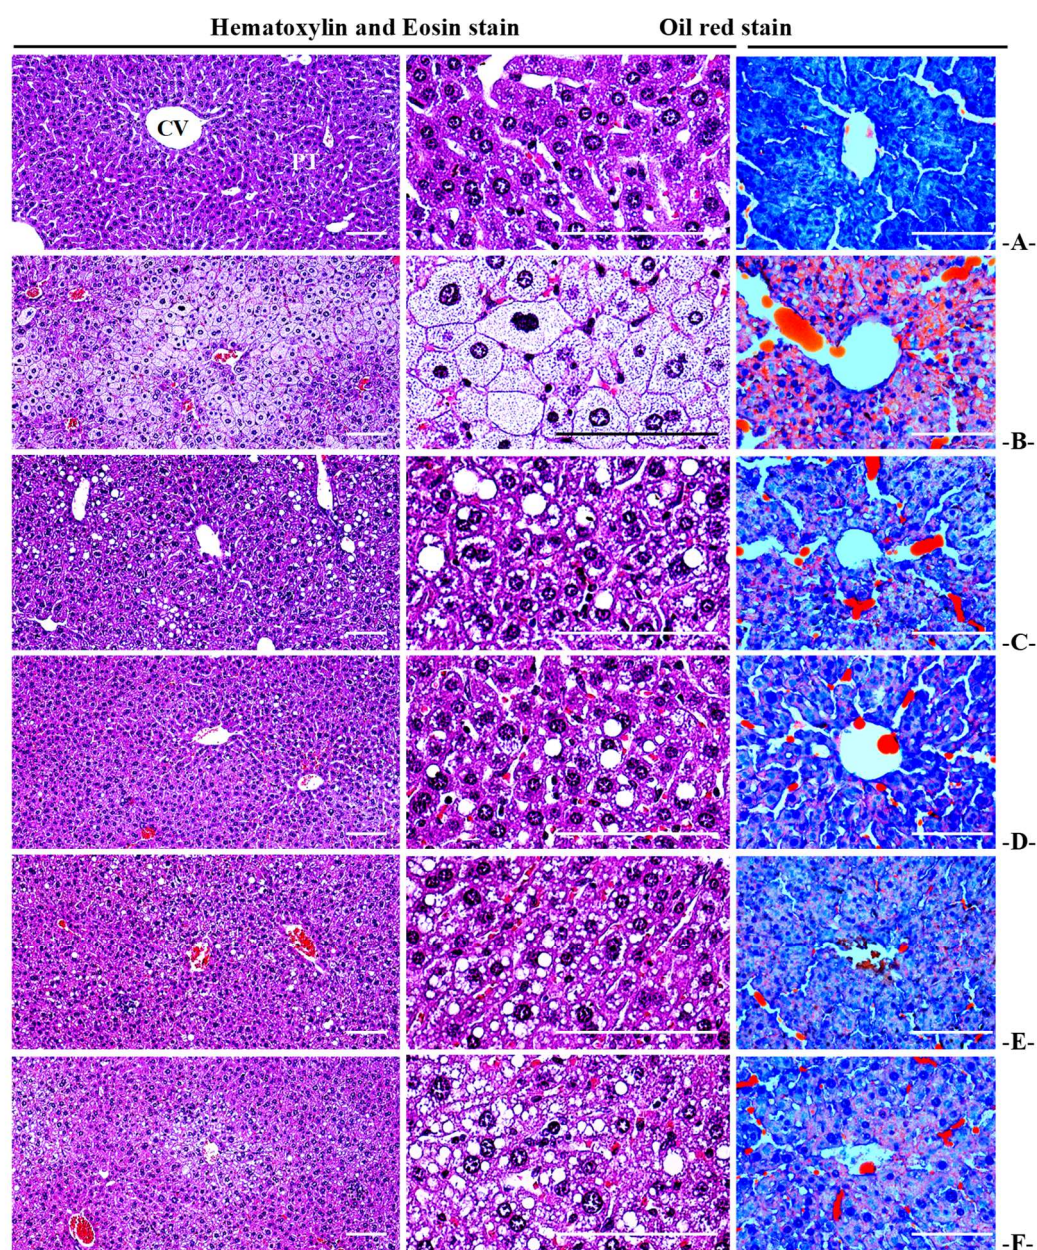

**Figure S6.** Representative histological images of the liver, taken from NFD or HFD supplied mice.

**A** = Vehicle (distilled water) 10 mL/kg orally administered mice with NFD supply (NFD control); **B** = Vehicle 10 mL/kg orally administered mice with HFD supply (HFD control); **C** = Metformin (250 mg/kg) oral administered mice with HFD supply (MET<sub>250</sub>); **D** = BCS (400 mg/kg) orally administered mice with HFD supply (BCS<sub>400</sub>); **E** = BCS (200 mg/kg) orally administered mice with HFD supply (BCS<sub>200</sub>); **F** = BCS (100 mg/kg) orally administered mice with HFD supply (BCS<sub>100</sub>); NFD = Normal pellet diet; HFD = 45% Kcal high fat diet; BCS = Black cumin (*Nigella sativa* L.) seeds extract; CV = Central vein; PT = Portal triad; Scale bars = 80  $\mu$ m

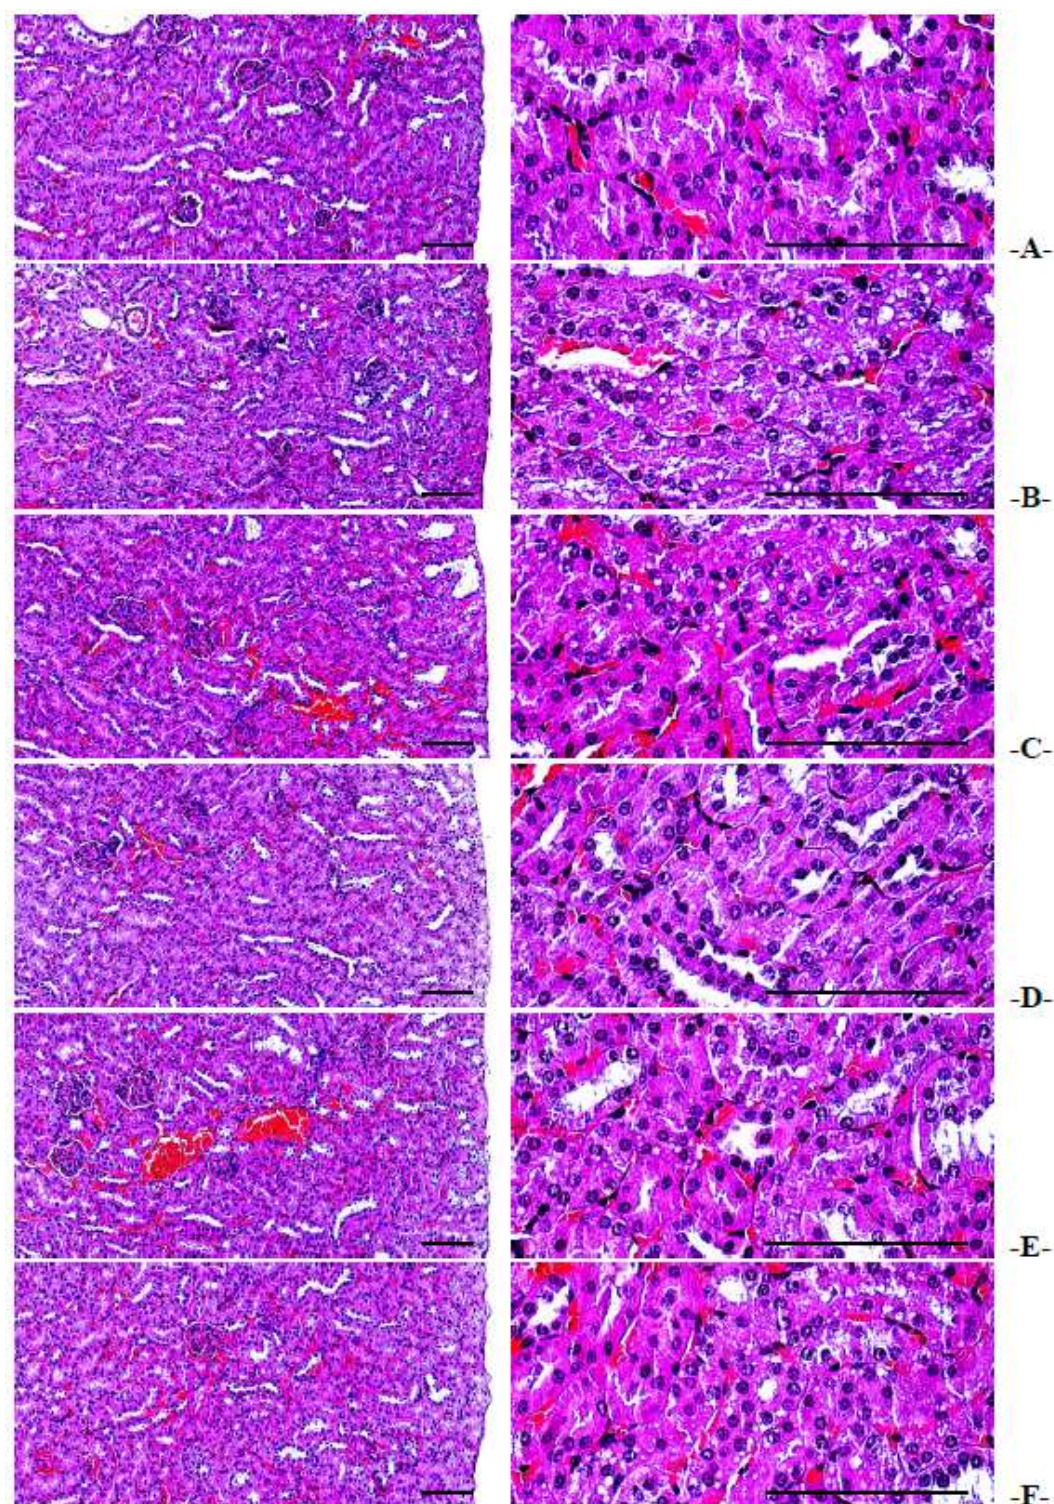

**Figure S7.** Representative histological images of the kidney, taken from NFD or HFD supplied mice.

A = Vehicle (distilled water) 10 mL/kg orally administered mice with NFD supply (NFD control); B = Vehicle 10 mL/kg orally administered mice with HFD supply (HFD control); C = Metformin (250 mg/kg) oral administered mice with HFD supply (MET<sub>250</sub>); D = BCS (400 mg/kg) orally administered mice with HFD supply (BCS<sub>400</sub>); E = BCS (200 mg/kg) orally administered mice with HFD supply (BCS<sub>200</sub>); F = BCS (100 mg/kg) orally administered mice with HFD supply (BCS<sub>100</sub>); NFD = Normal pellet diet; HFD = 45% Kcal high fat diet; BCS = Black cumin (*Nigella sativa* L.) seeds extract; All Hematoxylin and Eosin stain; Scale bars = 80  $\mu$ m
